# Supplementary material for: Transmission Characteristics and Inactivated Vaccine Effectiveness Against Transmission of SARS-CoV-2 Omicron BA.5 Variants in Urumqi, China
Source: PubMed Central journal article supplement (PMC10064257; doi:10.1001/jamanetworkopen.2023.5755), 2023-03-30
Supplement: jamanetwopen-e235755-s002.pdf [file jamanetwopen-e235755-s002.pdf]

## Data Sharing Statement

Wang. Transmission Characteristics and Inactivated Vaccine Effectiveness Against Transmission of SARS-CoV-2 Omicron BA.5 Variants in Urumqi, China. *JAMA Netw Open*. Published online March 30, 2023. doi:10.1001/jamanetworkopen.2023.5755

### Data

**Data available:** No

### Additional Information

**Explanation for why data not available:** The original database containing confidential patient information cannot be made public. The anonymized data that were used in this study is available via reasonable request to the corresponding authors.
